# Supplementary material
Source: PubMed Central journal article supplement (PMC2533276)

Table S1. Ramachandran plot after refinement of crambin structure in water or DMSO

|                      | Crambin in the mixed solvent |            | Crambin in DPC micelles |            |
|----------------------|------------------------------|------------|-------------------------|------------|
|                      | water                        | DMSO       | water                   | DMSO       |
| Ramachandran plot    |                              |            |                         |            |
| Most favored regions | 91.4 ± 3.7                   | 91.0 ± 3.8 | 87.7 ± 3.4              | 86.9 ± 5.0 |
| Additionally allowed | 6.6 ± 3.3                    | 7.0 ± 3.9  | 11.6 ± 3.4              | 12.1 ± 4.4 |
| Generously allowed   | 0.1 ± 0.2                    | 0.4 ± 0.1  | 0.3 ± 0.9               | 0.4 ± 1.1  |
| Disallowed           | 1.2 ± 1.5                    | 1.6 ± 1.7  | 0.4 ± 1.1               | 0.4 ± 1.1  |

Figure S1.  $^{15}\text{N}$  relaxation data ( $T_1$ ,  $T_2$  and  $^1\text{H}$ - $^{15}\text{N}$  NOE) of crambin in the mixed solvent (A, at 500 MHz for  $^1\text{H}$  frequency) and in DPC micelles (B, 600 MHz for  $^1\text{H}$  frequency).

A

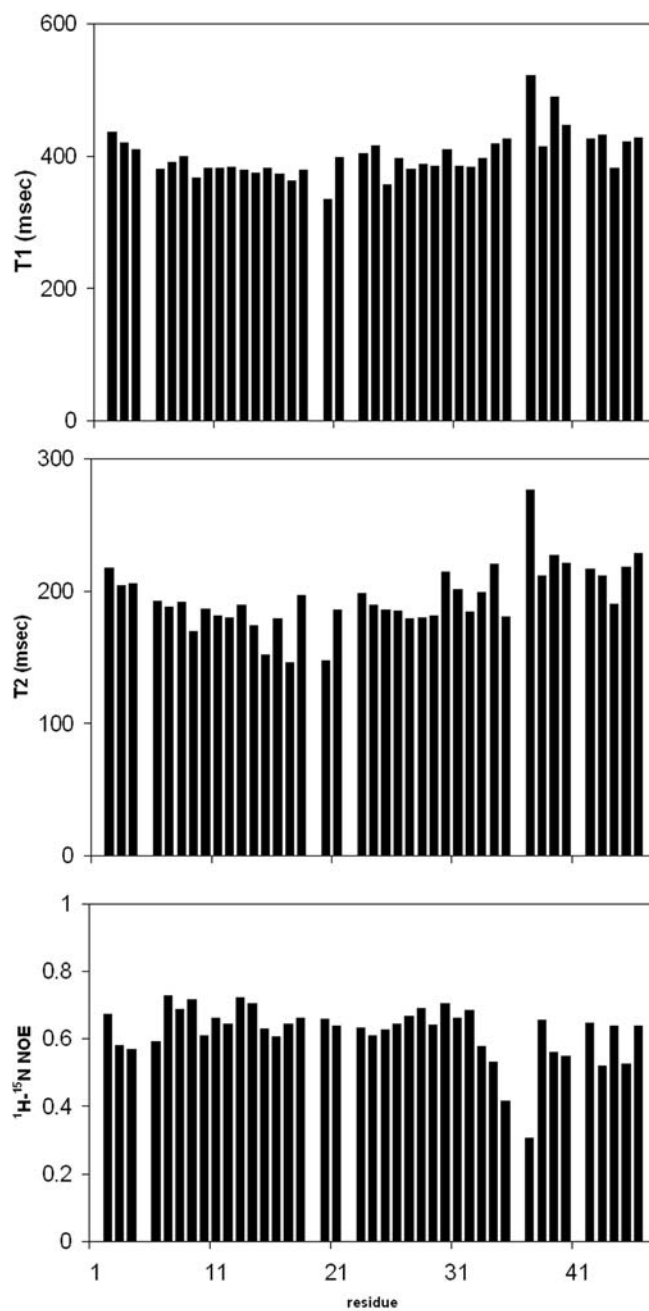

B

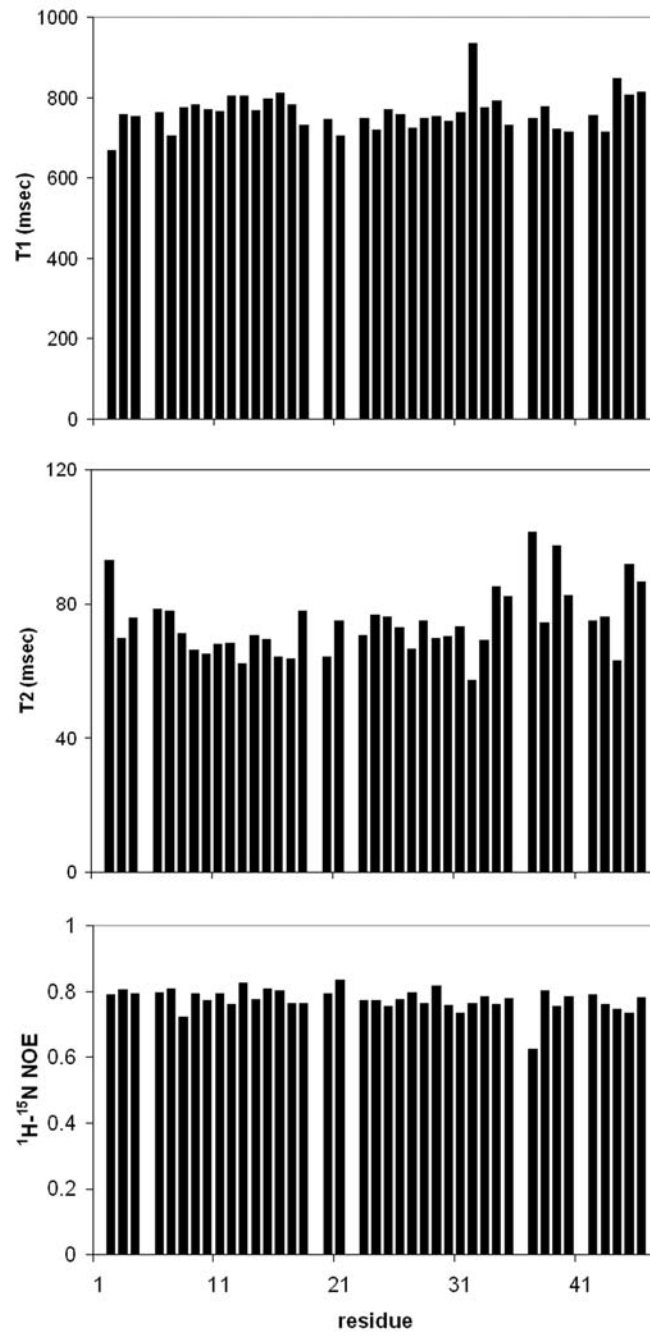

Supplement: NIHMS63163-supplement-1si20051115_02.pdf [file NIHMS63163-supplement-1si20051115_02.pdf]
